# Supplementary material for: Activation and Desensitization of Peripheral Muscle and Neuronal Nicotinic Acetylcholine Receptors by Selected, Naturally-Occurring Pyridine Alkaloids
Source: MDPI journal article supplement (doi:10.3390/toxins8070204), 2016-07-04
Supplement: s1 [file s1]

# Supplementary Materials: Activation and Desensitization of Peripheral Muscle and Neuronal Nicotinic Acetylcholine Receptors by Selected, Naturally-Occurring Pyridine Alkaloids

Benedict T. Green , Stephen T. Lee , Kevin D. Welch , Daniel Cook and William R. Kem

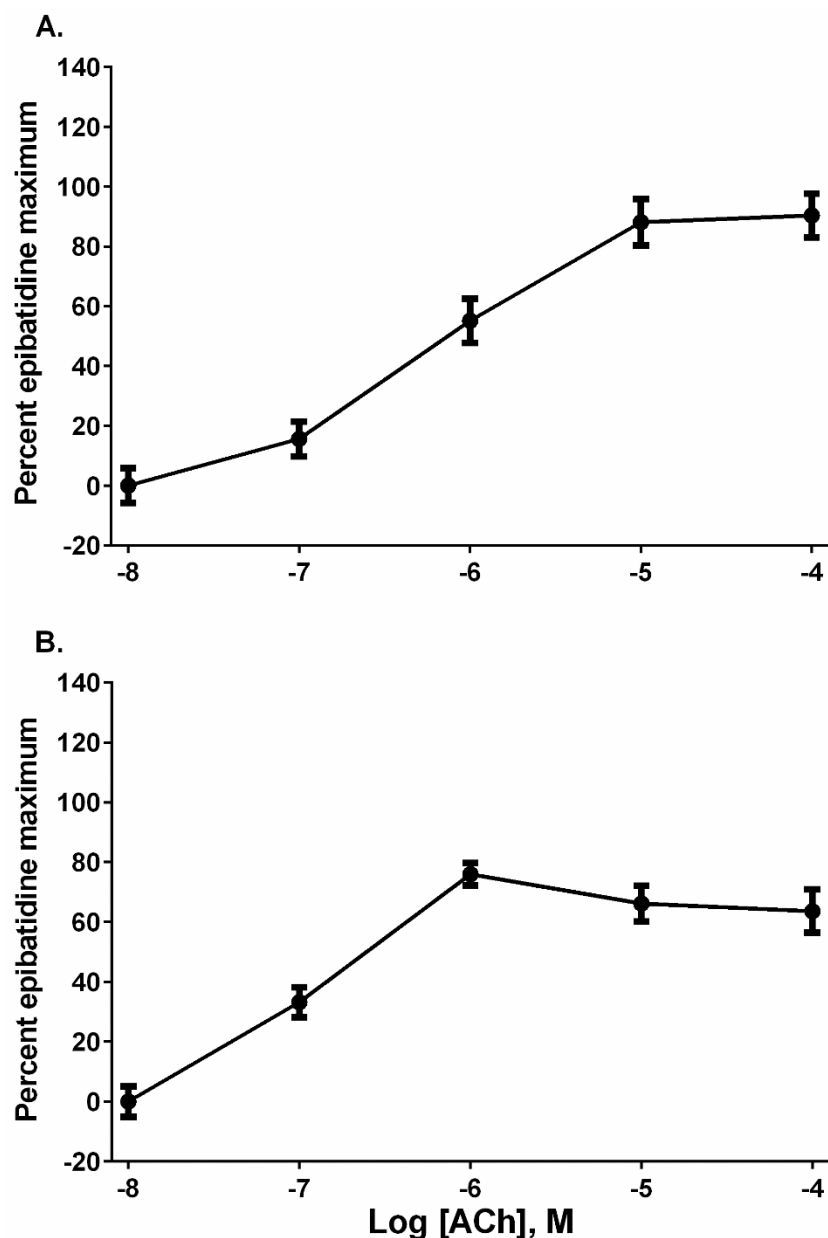

**Figure S1.** The concentration-response relationships for ACh using membrane potential sensing dye fluorescence in SH-SY5Y (A) and TE-671 (B) cells. The cellular responses to agonist were normalized to the maximum epibatidine response for each cell line.
